# Supplementary figures and images for: Spatio-Temporal Mutational Profile Appearances of Swedish SARS-CoV-2 during the Early Pandemic
Source: MDPI journal article supplement (doi:10.3390/v12091026), 2020-09-14

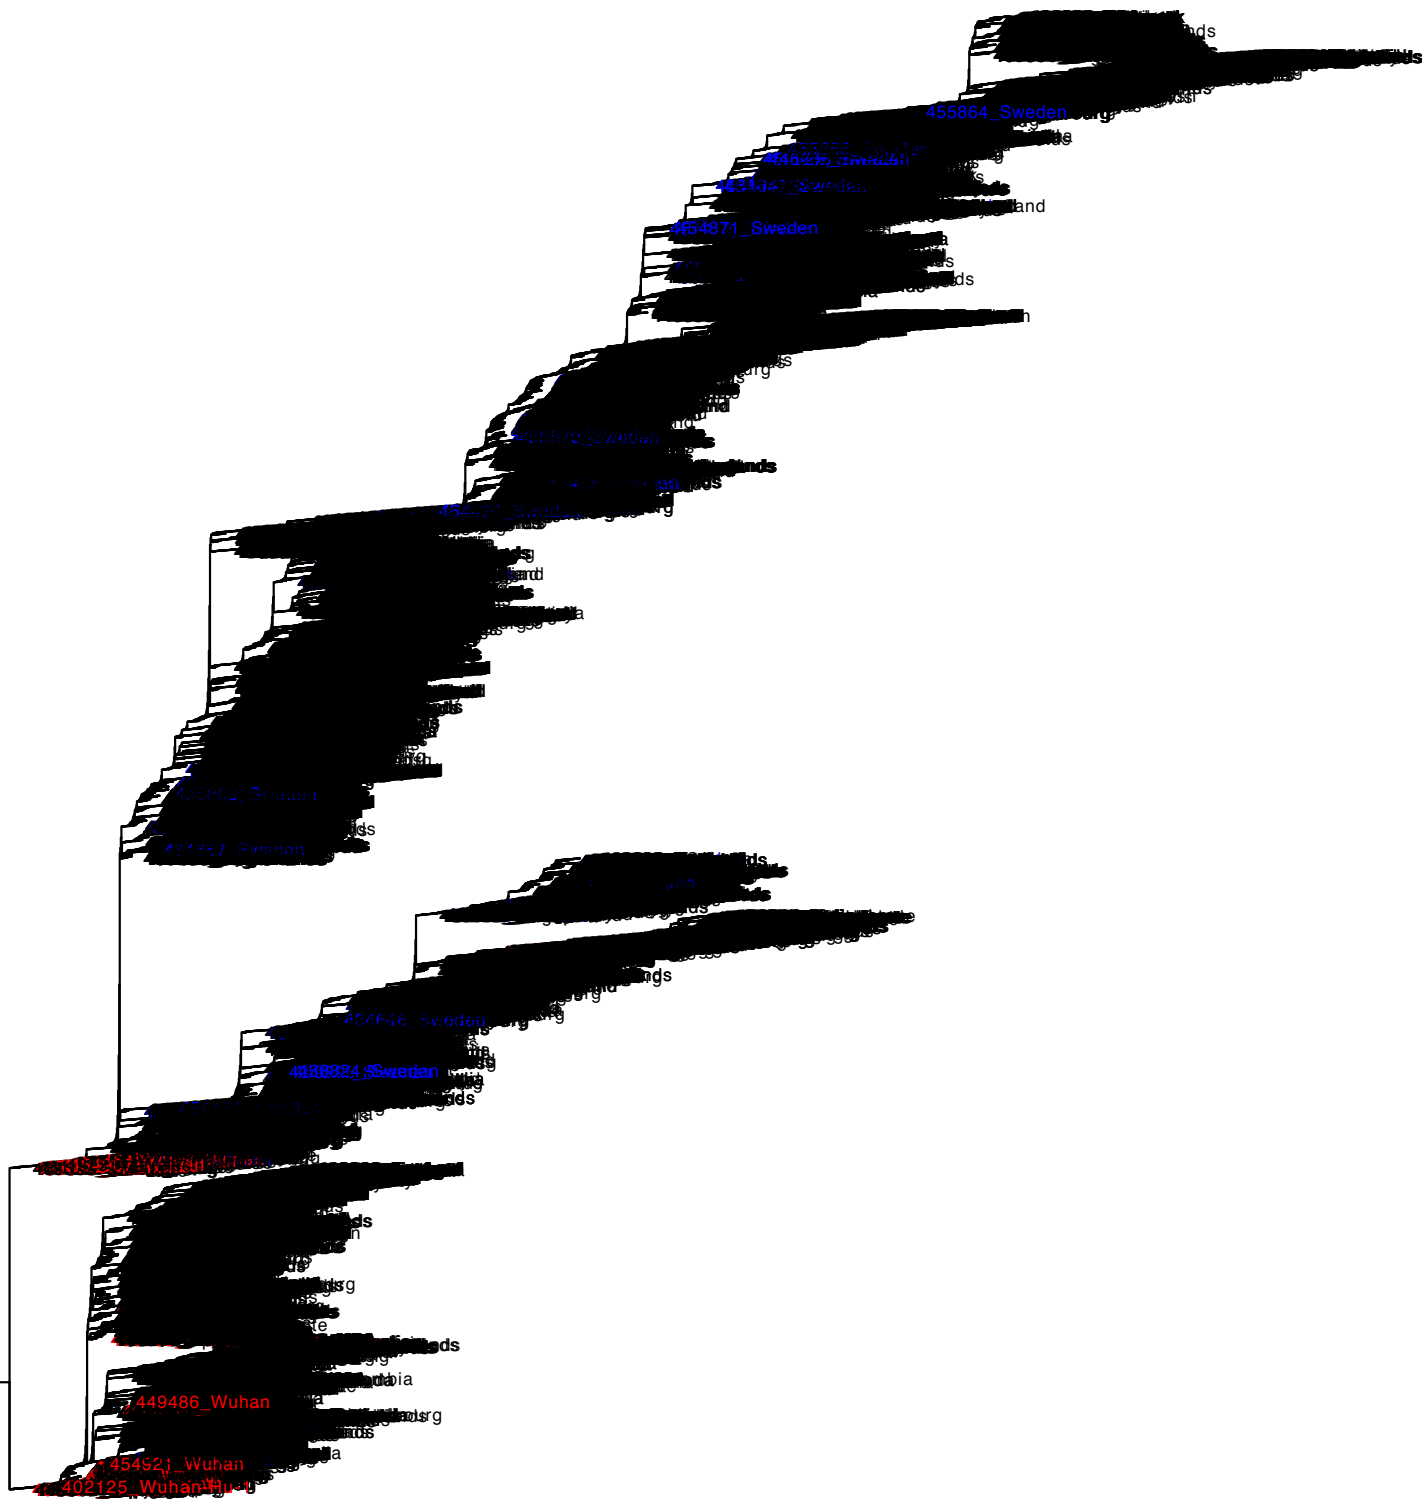

Supplement: s1 [file s1]
